# Supplementary material for: Formulation of Li-metal-halide (LMX) solid state electrolytes through extensive first principles modelling
Source: Royal Society of Chemistry journal article supplement (doi:10.1039/d1ta05849e), 2021-01-01
Supplement: d1ta05849e1.pdf [file d1ta05849e1.pdf]

### Electronic Supporting Materials

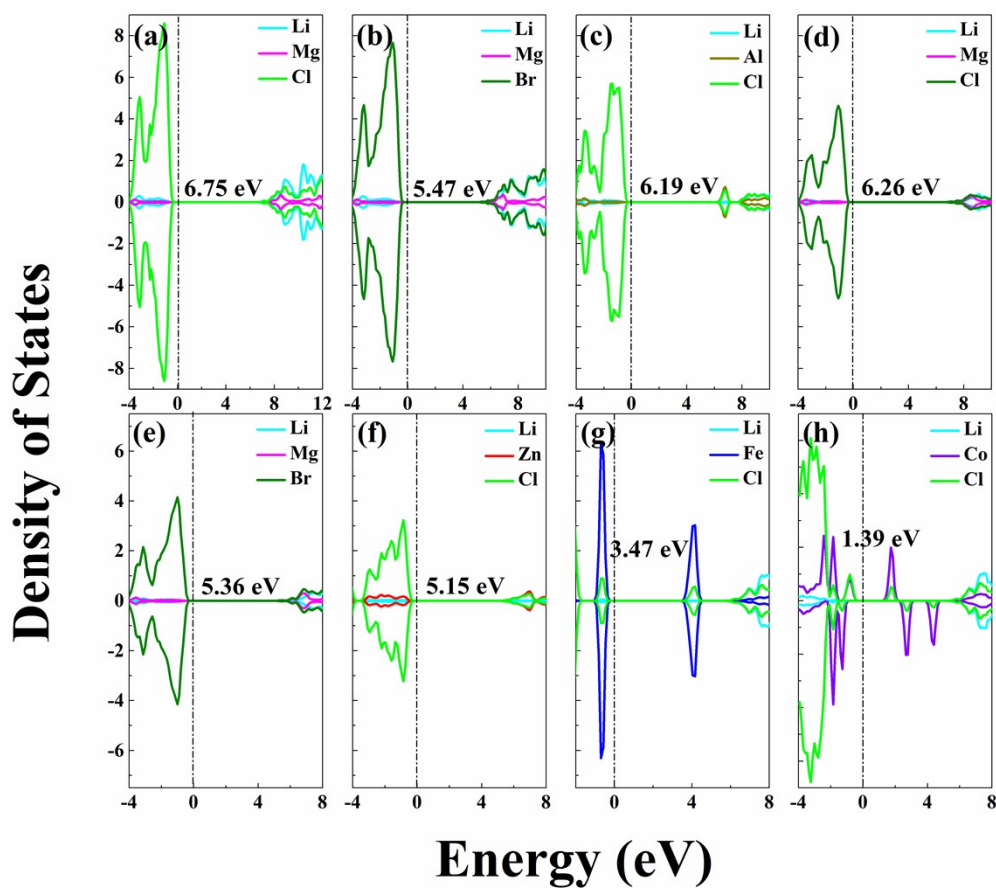

Fig. S1 Projected density of states (PDOS) calculated using the HSE06 functional: (a)  $\text{Li}_6\text{MgCl}_8$ , (b)  $\text{Li}_6\text{MgBr}_8$ , (c)  $\text{Li}_3\text{AlCl}_6$ , (d)  $\text{Li}_2\text{MgCl}_4$ , (e)  $\text{Li}_2\text{MgBr}_4$ , (f)  $\text{LiZnCl}_3$ , (g)  $\text{Li}_6\text{FeCl}_8$  and (h)  $\text{Li}_6\text{CoCl}_8$ .

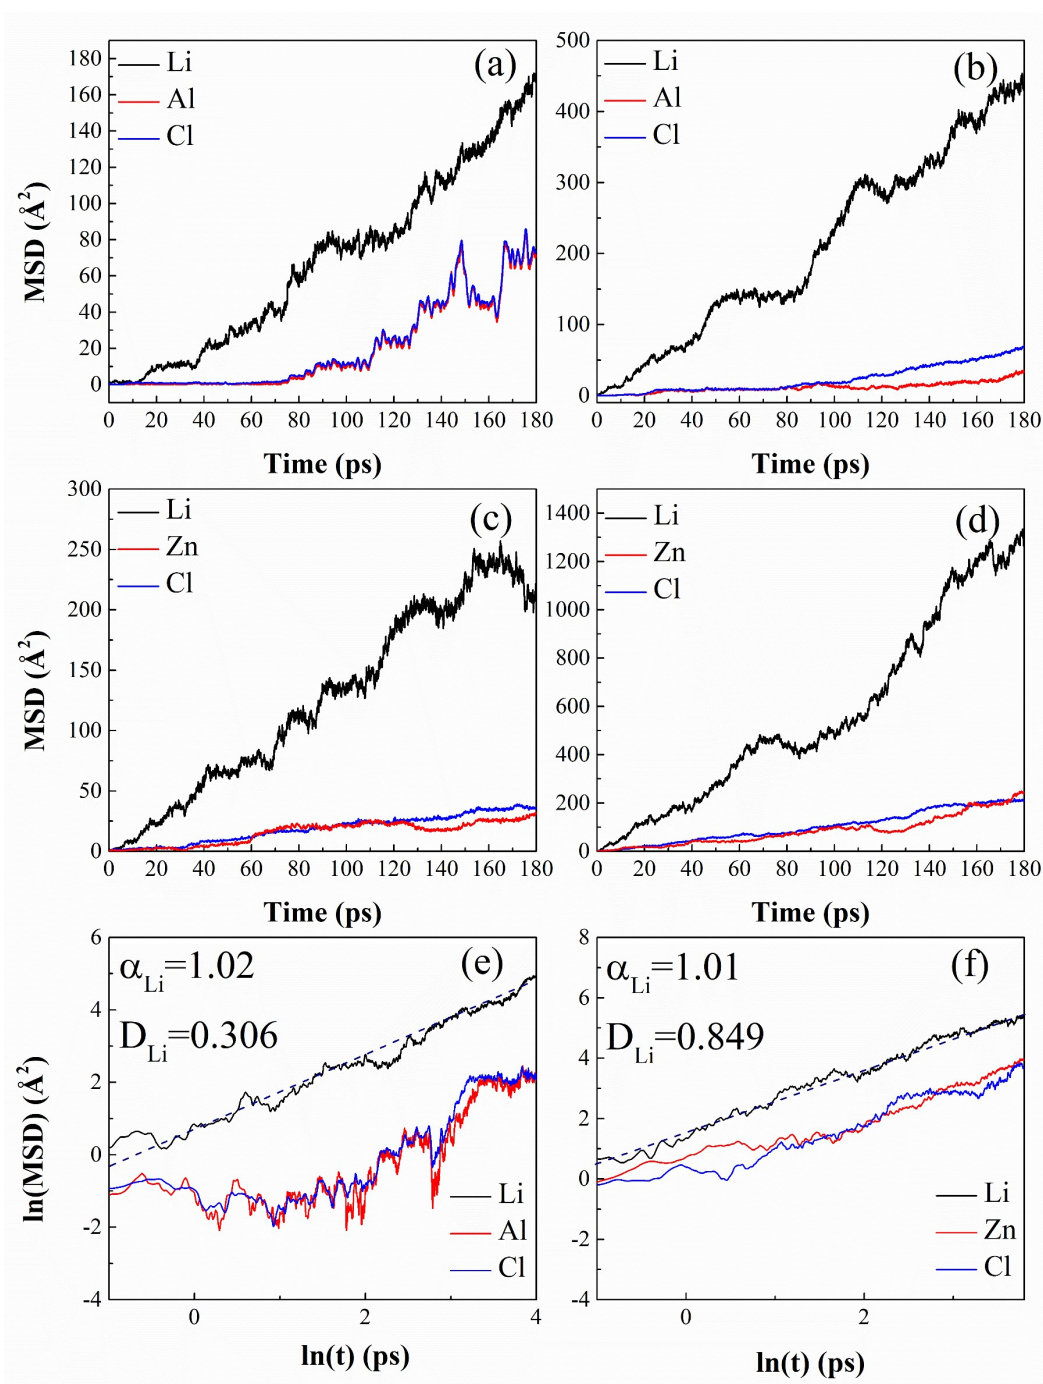

Fig. S2 MSD in Li<sub>3</sub>AlCl<sub>6</sub>-vac at (a) 650 K and (b) 900 K; and MSD in LiZnCl<sub>3</sub> at (c) 600 K and (d) 900 K. (e-f) The  $\ln\langle\text{MSD}\rangle$  of Li<sub>3</sub>AlCl<sub>6</sub>-vac and LiZnCl<sub>3</sub> at 900 K was plotted against  $\ln(t)$  to determine the Li<sup>+</sup> diffusion coefficients  $D$  ( $10^{-4} \text{ cm}^2 \text{ s}^{-1}$ ) and diffusion exponent  $\alpha$ .

**Table S1** The summary of the compounds through screening steps.

| Compounds                         | Octahedral factors | Structure        | Band Gap | PHONON | Formation Energy | AIMD | Voltage Plateau | Mechanical Property |
|-----------------------------------|--------------------|------------------|----------|--------|------------------|------|-----------------|---------------------|
| Li <sub>6</sub> BaCl <sub>8</sub> | ×                  |                  |          |        |                  |      |                 |                     |
| Li <sub>6</sub> BaBr <sub>8</sub> | ×                  |                  |          |        |                  |      |                 |                     |
| Li <sub>6</sub> CaCl <sub>8</sub> | ×                  |                  |          |        |                  |      |                 |                     |
| Li <sub>6</sub> CaBr <sub>8</sub> | ×                  |                  |          |        |                  |      |                 |                     |
| Li <sub>6</sub> CoCl <sub>8</sub> | √                  | USPEX(MP-505391) | 1.388    |        |                  |      |                 |                     |
| Li <sub>6</sub> CoBr <sub>8</sub> | √                  | USPEX            | 0.97     |        |                  |      |                 |                     |
| Li <sub>6</sub> CuCl <sub>8</sub> | √                  | USPEX            | 0.919    |        |                  |      |                 |                     |
| Li <sub>6</sub> CuBr <sub>8</sub> | √                  | USPEX            | 0.43     |        |                  |      |                 |                     |
| Li <sub>6</sub> FeCl <sub>8</sub> | √                  | USPEX(MP-28828)  | 3.469    |        |                  |      |                 |                     |
| Li <sub>6</sub> FeBr <sub>8</sub> | √                  | USPEX            | 3.236    |        |                  |      |                 |                     |
| Li <sub>6</sub> MgCl <sub>8</sub> | √                  | USPEX            | 6.753(√) | √      | √                | √    | 0-4.0116        | √                   |
| Li <sub>6</sub> MgBr <sub>8</sub> | √                  | USPEX(MP-29008)  | 5.474(√) | √      | √                | √    | 0-4.77          | √                   |
| Li <sub>6</sub> MnCl <sub>8</sub> | √                  | USPEX            | 3.126    |        |                  |      |                 |                     |
| Li <sub>6</sub> MnBr <sub>8</sub> | √                  | USPEX            | 2.794    |        |                  |      |                 |                     |
| Li <sub>6</sub> NiCl <sub>8</sub> | √                  | MP-1211124       | 3.518    |        |                  |      |                 |                     |
| Li <sub>6</sub> NiBr <sub>8</sub> | ×                  |                  |          |        |                  |      |                 |                     |
| Li <sub>6</sub> TiCl <sub>8</sub> | √                  | USPEX            | 0        |        |                  |      |                 |                     |
| Li <sub>6</sub> TiBr <sub>8</sub> | √                  | USPEX            | 0        |        |                  |      |                 |                     |
| Li <sub>6</sub> ZnCl <sub>8</sub> | ×                  |                  |          |        |                  |      |                 |                     |
| Li <sub>6</sub> ZnBr <sub>8</sub> | ×                  |                  |          |        |                  |      |                 |                     |
| Li <sub>4</sub> BaCl <sub>6</sub> | ×                  |                  |          |        |                  |      |                 |                     |
| Li <sub>4</sub> BaBr <sub>6</sub> | ×                  |                  |          |        |                  |      |                 |                     |
| Li <sub>4</sub> CaCl <sub>6</sub> | ×                  |                  |          |        |                  |      |                 |                     |
| Li <sub>4</sub> CaBr <sub>6</sub> | ×                  |                  |          |        |                  |      |                 |                     |
| Li <sub>4</sub> CoCl <sub>6</sub> | ×                  |                  |          |        |                  |      |                 |                     |
| Li <sub>4</sub> CoBr <sub>6</sub> | ×                  |                  |          |        |                  |      |                 |                     |
| Li <sub>4</sub> CuCl <sub>6</sub> | ×                  |                  |          |        |                  |      |                 |                     |
| Li <sub>4</sub> CuBr <sub>6</sub> | ×                  |                  |          |        |                  |      |                 |                     |
| Li <sub>4</sub> FeCl <sub>6</sub> | √                  | USPEX            | 4.338    |        |                  |      |                 |                     |
| Li <sub>4</sub> FeBr <sub>6</sub> | √                  | USPEX            | 2.535    |        |                  |      |                 |                     |
| Li <sub>4</sub> MgCl <sub>6</sub> | ×                  |                  |          |        |                  |      |                 |                     |
| Li <sub>4</sub> MgBr <sub>6</sub> | ×                  |                  |          |        |                  |      |                 |                     |
| Li <sub>4</sub> MnCl <sub>6</sub> | √                  | USPEX            | 3.655    |        |                  |      |                 |                     |
| Li <sub>4</sub> MnBr <sub>6</sub> | √                  | USPEX            | 3.653    |        |                  |      |                 |                     |





Table S2 Ionic radius data and calculated octahedral factors in  $MX_6$ .

| Ionic radius (Å)         | Octahedral factor |       |
|--------------------------|-------------------|-------|
|                          | M/Cl              | M/Br  |
| Li <sup>+</sup>          | 0.42              | 0.388 |
| Al <sup>3+</sup> (0.535) | 0.3               | 0.273 |
| Ba <sup>2+</sup> (1.35)  | 0.746             | 0.689 |
| Ca <sup>2+</sup> (1.0)   | 0.55              | 0.51  |
| Co <sup>2+</sup> (0.745) | 0.412             | 0.38  |
| Cu <sup>2+</sup> (0.73)  | 0.4               | 0.37  |
| Fe <sup>3+</sup> (0.55)  | 0.304             | 0.281 |
| Fe <sup>2+</sup> (0.61)  | 0.337             | 0.311 |
| Mg <sup>2+</sup> (0.72)  | 0.398             | 0.367 |
| Mn <sup>2+</sup> (0.67)  | 0.37              | 0.342 |
| Ni <sup>2+</sup> (0.69)  | 0.38              | 0.352 |
| Ti <sup>2+</sup> (0.86)  | 0.475             | 0.439 |
| Zn <sup>2+</sup> (0.86)  | 0.475             | 0.439 |

Table S3 Lattice parameters and space groups of various minimal energy compounds from USPEX

| Confs                             | a     | b     | c(Å)  | $\alpha$ | $\beta$ | $\gamma(^{\circ})$ | Symmetry                  | Average Octahedral Factor |
|-----------------------------------|-------|-------|-------|----------|---------|--------------------|---------------------------|---------------------------|
| Li <sub>6</sub> CoCl <sub>8</sub> | 10.22 | 10.22 | 10.22 | 90       | 90      | 90                 | <i>FM</i> $\bar{3}M(225)$ | 0.419                     |
| Li <sub>6</sub> CoBr <sub>8</sub> | 10.92 | 10.92 | 10.92 | 90       | 90      | 90                 | <i>FM</i> $\bar{3}M(225)$ | 0.387                     |
| Li <sub>6</sub> CuCl <sub>8</sub> | 10.27 | 10.27 | 10.27 | 90       | 90      | 90                 | <i>FM</i> $\bar{3}M(225)$ | 0.417                     |
| Li <sub>6</sub> CuBr <sub>8</sub> | 10.97 | 10.97 | 10.97 | 90       | 90      | 90                 | <i>FM</i> $\bar{3}M(225)$ | 0.385                     |
| Li <sub>6</sub> FeCl <sub>8</sub> | 10.22 | 10.22 | 10.22 | 90       | 90      | 90                 | <i>FM</i> $\bar{3}M(225)$ | 0.408                     |
| Li <sub>6</sub> FeBr <sub>8</sub> | 10.92 | 10.92 | 10.92 | 90       | 90      | 90                 | <i>FM</i> $\bar{3}M(225)$ | 0.377                     |
| Li <sub>6</sub> MgCl <sub>8</sub> | 10.35 | 10.35 | 10.35 | 90       | 90      | 90                 | <i>FM</i> $\bar{3}M(225)$ | 0.417                     |
| Li <sub>6</sub> MgBr <sub>8</sub> | 11.06 | 11.06 | 11.06 | 90       | 90      | 90                 | <i>FM</i> $\bar{3}M(225)$ | 0.385                     |
| Li <sub>6</sub> MnCl <sub>8</sub> | 10.24 | 10.24 | 10.24 | 90       | 90      | 90                 | <i>FM</i> $\bar{3}M(225)$ | 0.413                     |
| Li <sub>6</sub> MnBr <sub>8</sub> | 11.06 | 11.06 | 11.06 | 90       | 90      | 90                 | <i>FM</i> $\bar{3}M(225)$ | 0.381                     |
| Li <sub>6</sub> NiCl <sub>8</sub> | 10.27 | 10.27 | 10.27 | 90       | 90      | 90                 | <i>FM</i> $\bar{3}M(225)$ | 0.414                     |
| Li <sub>6</sub> TiCl <sub>8</sub> | 24.99 | 3.71  | 6.68  | 90       | 84.8    | 90                 | <i>CM</i> (8)             | 0.428                     |
| Li <sub>6</sub> TiBr <sub>8</sub> | 26.76 | 3.97  | 7.11  | 90       | 84.69   | 90                 | <i>CM</i> (8)             | 0.395                     |
| Li <sub>4</sub> FeCl <sub>6</sub> | 16.53 | 3.53  | 7.19  | 90       | 104.12  | 90                 | <i>C2/M</i> (12)          | 0.403                     |
| Li <sub>4</sub> FeBr <sub>6</sub> | 17.64 | 3.81  | 7.76  | 90       | 76.50   | 90                 | <i>C2/M</i> (12)          | 0.373                     |
| Li <sub>4</sub> MnCl <sub>6</sub> | 16.69 | 3.54  | 7.18  | 90       | 104.29  | 90                 | <i>C2/M</i> (12)          | 0.41                      |
| Li <sub>4</sub> MnBr <sub>6</sub> | 17.48 | 3.87  | 7.81  | 90       | 103.35  | 90                 | <i>C2/M</i> (12)          | 0.379                     |

|                            |       |       |       |    |        |     |                   |       |
|----------------------------|-------|-------|-------|----|--------|-----|-------------------|-------|
| $\text{Li}_4\text{TiCl}_6$ | 16.84 | 3.56  | 7.26  | 90 | 103.31 | 90  | $C2/M(12)$        | 0.431 |
| $\text{Li}_4\text{TiBr}_6$ | 17.97 | 3.80  | 7.74  | 90 | 103.11 | 90  | $C2/M(12)$        | 0.398 |
| $\text{Li}_3\text{AlCl}_6$ | 6.26  | 6.26  | 6.24  | 90 | 90     | 120 | $P\bar{3}1M(162)$ | 0.39  |
| $\text{Li}_3\text{FeCl}_6$ | 6.21  | 6.21  | 6.15  | 90 | 90     | 120 | $P\bar{3}1M(162)$ | 0.391 |
| $\text{Li}_3\text{FeBr}_6$ | 6.62  | 6.62  | 6.54  | 90 | 90     | 120 | $P\bar{3}1M(162)$ | 0.361 |
| $\text{Li}_2\text{CoCl}_4$ | 10.26 | 7.32  | 3.63  | 90 | 90     | 90  | $CMMM(65)$        | 0.417 |
| $\text{Li}_2\text{CoBr}_4$ | 7.903 | 5.395 | 3.665 | 90 | 90     | 90  | $PM(47)$          | 0.385 |
| $\text{Li}_2\text{CuCl}_4$ | 7.999 | 9.712 | 3.983 | 90 | 104.05 | 90  | $CM(8)$           | 0.413 |
| $\text{Li}_2\text{CuBr}_4$ | 8.559 | 10.22 | 4.243 | 90 | 75.299 | 90  | $CM(8)$           | 0.382 |
| $\text{Li}_2\text{FeCl}_4$ | 7.48  | 7.37  | 10.30 | 90 | 90     | 90  | $IMMA(74)$        | 0.392 |
| $\text{Li}_2\text{FeBr}_4$ | 7.95  | 7.87  | 10.98 | 90 | 90     | 90  | $IMMA(74)$        | 0.362 |
| $\text{Li}_2\text{MgCl}_4$ | 7.39  | 7.46  | 10.52 | 90 | 90     | 90  | $IMMA(74)$        | 0.417 |
| $\text{Li}_2\text{MgBr}_4$ | 7.89  | 11.13 | 3.89  | 90 | 90     | 90  | $CMMM(65)$        | 0.381 |
| $\text{Li}_2\text{MnCl}_4$ | 7.42  | 7.516 | 10.51 | 90 | 90     | 90  | $IMMA(74)$        | 0.403 |
| $\text{Li}_2\text{MnBr}_4$ | 7.88  | 11.13 | 3.89  | 90 | 90     | 90  | $CMMM(65)$        | 0.373 |
| $\text{Li}_2\text{TiCl}_4$ | 7.38  | 10.62 | 3.56  | 90 | 90     | 90  | $CMMM(65)$        | 0.438 |
| $\text{Li}_2\text{TiBr}_4$ | 7.86  | 11.28 | 3.79  | 90 | 90     | 90  | $CMMM(65)$        | 0.405 |
| $\text{LiFeCl}_4$          | 6.63  | 8.41  | 13.16 | 90 | 90.76  | 90  | $P2_1/C(14)$      | 0.362 |
| $\text{LiFeBr}_4$          | 7.55  | 7.44  | 14.13 | 90 | 93.55  | 90  | $P2_1/C(14)$      | 0.335 |
| $\text{LiNiCl}_3$          | 3.99  | 3.99  | 21.22 | 90 | 90     | 120 | $R3M(160)$        | 0.4   |
| $\text{LiNiBr}_3$          | 4.25  | 4.25  | 22.61 | 90 | 90     | 120 | $R3M(160)$        | 0.37  |
| $\text{LiCuCl}_3$          | 11.74 | 4.70  | 4.08  | 90 | 90.47  | 90  | $CM(8)$           | 0.41  |
| $\text{LiCuBr}_3$          | 12.44 | 5.03  | 4.39  | 90 | 91.41  | 90  | $CM(8)$           | 0.379 |
| $\text{LiTiCl}_3$          | 13.08 | 7.16  | 12.90 | 90 | 114.02 | 90  | $CM(8)$           | 0.448 |
| $\text{LiZnCl}_3$          | 6.09  | 3.70  | 6.34  | 90 | 115.34 | 90  | $PM(6)$           | 0.448 |

Table S4 Formation energies for the compounds of interest with respect to the corresponding reference phases

| Compounds                         | Reference phase                        | Formation energy (eV/atom) |
|-----------------------------------|----------------------------------------|----------------------------|
| LiMgCl <sub>3</sub>               | LiCl+MgCl <sub>2</sub>                 | 0.0267                     |
| Li <sub>2</sub> MgCl <sub>4</sub> | LiCl+2MgCl <sub>2</sub>                | -0.006565                  |
| Li <sub>4</sub> MgCl <sub>6</sub> | LiCl+Li <sub>2</sub> MgCl <sub>4</sub> | 0.00637649                 |
| Li <sub>6</sub> MgCl <sub>8</sub> | LiCl+Li <sub>2</sub> MgCl <sub>4</sub> | 0.00202287                 |
| LiMgBr <sub>3</sub>               | LiBr+MgBr <sub>2</sub>                 | 0.0385                     |
| Li <sub>2</sub> MgBr <sub>4</sub> | LiBr+MgBr <sub>2</sub>                 | -0.000020476               |
| Li <sub>4</sub> MgBr <sub>6</sub> | LiBr+Li <sub>2</sub> MgBr <sub>4</sub> | 0.00075745                 |
| Li <sub>6</sub> MgBr <sub>8</sub> | LiBr+Li <sub>2</sub> MgBr <sub>4</sub> | -0.00049766                |
| LiAlCl <sub>4</sub>               | LiCl+AlCl <sub>3</sub>                 | -0.05549                   |
| Li <sub>3</sub> AlCl <sub>6</sub> | LiCl+LiAlCl <sub>4</sub>               | 0.0243                     |
| LiZnCl <sub>3</sub>               | LiCl+ZnCl <sub>2</sub>                 | 0.012713                   |
| Li <sub>2</sub> ZnCl <sub>4</sub> | LiCl+ZnCl <sub>2</sub>                 | -0.015131754               |
| Li <sub>4</sub> ZnCl <sub>6</sub> | LiCl+Li <sub>2</sub> ZnCl <sub>4</sub> | -0.004744                  |
| Li <sub>6</sub> ZnCl <sub>8</sub> | LiCl+Li <sub>4</sub> ZnCl <sub>6</sub> | 0.0229                     |

POSCAR files of identified in this work:

LiZnCl<sub>3</sub>

```
6.0928001404      0.0000000000      0.0000000000
0.0000000000      3.6989998817      0.0000000000
-2.7120750913      0.0000000000      5.7261047277
```

```
Li  Cl  Zn
1   3   1
```

Direct

```
0.504620016      0.500000000      0.663339972
0.408890009      0.500000000      0.028170001
0.810270011      0.000000000      0.779879987
0.218960002      0.000000000      0.434350014
0.189349994      0.000000000      0.066930003
```

Li<sub>2</sub>MgCl<sub>4</sub>

```
7.3668999672      0.0000000000      0.0000000000
0.0000000000      10.4561996460     0.0000000000
0.0000000000      0.0000000000      3.6547000408
```

```
Li  Mg  Cl
4   2   8
```

Direct

```
0.750000000      0.750000000      0.500000000
0.250000000      0.250000000      0.500000000
0.250000000      0.750000000      0.500000000
```



|             |             |             |
|-------------|-------------|-------------|
| 0.750000000 | 0.250000000 | 0.500000000 |
| 0.000000000 | 0.000000000 | 0.000000000 |
| 0.500000000 | 0.500000000 | 0.000000000 |
| 0.265879989 | 0.500000000 | 0.500000000 |
| 0.734120011 | 0.500000000 | 0.500000000 |
| 0.765879989 | 0.000000000 | 0.500000000 |
| 0.234120011 | 0.000000000 | 0.500000000 |
| 0.000000000 | 0.760859966 | 0.000000000 |
| 0.000000000 | 0.239140004 | 0.000000000 |
| 0.500000000 | 0.260859996 | 0.000000000 |
| 0.500000000 | 0.739140034 | 0.000000000 |

Li<sub>2</sub>MgBr<sub>4</sub>

|              |               |              |
|--------------|---------------|--------------|
| 7.8871998787 | 0.0000000000  | 0.0000000000 |
| 0.0000000000 | 11.1295003891 | 0.0000000000 |
| 0.0000000000 | 0.0000000000  | 3.8891999722 |

|    |    |    |
|----|----|----|
| Li | Mg | Br |
| 4  | 2  | 8  |

Direct

|             |             |             |
|-------------|-------------|-------------|
| 0.750000000 | 0.750000000 | 0.500000000 |
| 0.250000000 | 0.250000000 | 0.500000000 |
| 0.250000000 | 0.750000000 | 0.500000000 |
| 0.750000000 | 0.250000000 | 0.500000000 |
| 0.000000000 | 0.500000000 | 0.000000000 |
| 0.500000000 | 0.000000000 | 0.000000000 |
| 0.000000000 | 0.741129994 | 0.000000000 |
| 0.000000000 | 0.258870006 | 0.000000000 |
| 0.500000000 | 0.241129994 | 0.000000000 |
| 0.500000000 | 0.758870006 | 0.000000000 |
| 0.763490021 | 0.500000000 | 0.500000000 |
| 0.236509994 | 0.500000000 | 0.500000000 |
| 0.263490021 | 0.000000000 | 0.500000000 |
| 0.736509979 | 0.000000000 | 0.500000000 |

Li<sub>3</sub>AlCl<sub>6</sub>

|               |              |              |
|---------------|--------------|--------------|
| 6.2641000748  | 0.0000000000 | 0.0000000000 |
| -3.1320500374 | 5.4248697966 | 0.0000000000 |
| 0.0000000000  | 0.0000000000 | 6.2431998253 |

|    |    |    |
|----|----|----|
| Li | Al | Cl |
| 3  | 1  | 6  |

Direct

|             |             |             |
|-------------|-------------|-------------|
| 0.333333343 | 0.666666687 | 0.500000000 |
| 0.666666627 | 0.333333313 | 0.500000000 |
| 0.000000000 | 0.000000000 | 0.000000000 |
| 0.000000000 | 0.000000000 | 0.500000000 |
| 0.303730011 | 0.303730011 | 0.719079971 |
| 0.696269989 | 0.696269989 | 0.280920029 |
| 0.696269989 | 0.000000000 | 0.719079971 |
| 0.303730011 | 0.000000000 | 0.280920029 |

|            |            |            |
|------------|------------|------------|
| 0.00000000 | 0.69626989 | 0.71907971 |
| 0.00000000 | 0.30373011 | 0.28092029 |

Li<sub>6</sub>MgCl<sub>8</sub>

|              |              |              |
|--------------|--------------|--------------|
| 10.351799649 | 0.000000000  | 0.000000000  |
| 0.000000000  | 10.351799649 | 0.000000000  |
| 0.000000000  | 0.000000000  | 10.351799649 |

|    |    |    |
|----|----|----|
| Li | Mg | Cl |
| 24 | 4  | 32 |

Direct

|             |             |             |
|-------------|-------------|-------------|
| 0.25000000  | 0.50000000  | 0.25000000  |
| 0.75000000  | 0.50000000  | 0.75000000  |
| 0.75000000  | 0.50000000  | 0.25000000  |
| 0.25000000  | 0.50000000  | 0.75000000  |
| 0.25000000  | 0.25000000  | 0.50000000  |
| 0.75000000  | 0.75000000  | 0.50000000  |
| 0.25000000  | 0.75000000  | 0.50000000  |
| 0.75000000  | 0.25000000  | 0.50000000  |
| 0.50000000  | 0.25000000  | 0.25000000  |
| 0.50000000  | 0.75000000  | 0.75000000  |
| 0.50000000  | 0.25000000  | 0.75000000  |
| 0.50000000  | 0.75000000  | 0.25000000  |
| 0.25000000  | 0.00000000  | 0.75000000  |
| 0.75000000  | 0.00000000  | 0.25000000  |
| 0.75000000  | 0.00000000  | 0.75000000  |
| 0.25000000  | 0.00000000  | 0.25000000  |
| 0.25000000  | 0.75000000  | 0.00000000  |
| 0.75000000  | 0.25000000  | 0.00000000  |
| 0.25000000  | 0.25000000  | 0.00000000  |
| 0.75000000  | 0.75000000  | 0.00000000  |
| 0.00000000  | 0.25000000  | 0.75000000  |
| 0.00000000  | 0.75000000  | 0.25000000  |
| 0.00000000  | 0.25000000  | 0.25000000  |
| 0.00000000  | 0.75000000  | 0.75000000  |
| 0.00000000  | 0.00000000  | 0.00000000  |
| 0.00000000  | 0.50000000  | 0.50000000  |
| 0.50000000  | 0.00000000  | 0.50000000  |
| 0.50000000  | 0.50000000  | 0.00000000  |
| 0.50000000  | 0.758530021 | 0.50000000  |
| 0.50000000  | 0.241469994 | 0.50000000  |
| 0.50000000  | 0.50000000  | 0.758530021 |
| 0.50000000  | 0.50000000  | 0.241469994 |
| 0.758530021 | 0.50000000  | 0.50000000  |
| 0.241469994 | 0.50000000  | 0.50000000  |
| 0.50000000  | 0.258530021 | 0.00000000  |
| 0.50000000  | 0.741469979 | 0.00000000  |
| 0.50000000  | 0.00000000  | 0.258530021 |
| 0.50000000  | 0.00000000  | 0.741469979 |
| 0.758530021 | 0.00000000  | 0.00000000  |
| 0.241469994 | 0.00000000  | 0.00000000  |
| 0.00000000  | 0.758530021 | 0.00000000  |

|             |             |             |
|-------------|-------------|-------------|
| 0.00000000  | 0.24146994  | 0.00000000  |
| 0.00000000  | 0.50000000  | 0.258530021 |
| 0.00000000  | 0.50000000  | 0.741469979 |
| 0.258530021 | 0.50000000  | 0.00000000  |
| 0.741469979 | 0.50000000  | 0.00000000  |
| 0.00000000  | 0.258530021 | 0.50000000  |
| 0.00000000  | 0.741469979 | 0.50000000  |
| 0.00000000  | 0.00000000  | 0.758530021 |
| 0.00000000  | 0.00000000  | 0.241469994 |
| 0.258530021 | 0.00000000  | 0.50000000  |
| 0.741469979 | 0.00000000  | 0.50000000  |
| 0.75000000  | 0.25000000  | 0.75000000  |
| 0.25000000  | 0.75000000  | 0.25000000  |
| 0.25000000  | 0.75000000  | 0.75000000  |
| 0.75000000  | 0.25000000  | 0.25000000  |
| 0.25000000  | 0.25000000  | 0.25000000  |
| 0.75000000  | 0.75000000  | 0.75000000  |
| 0.75000000  | 0.75000000  | 0.25000000  |
| 0.25000000  | 0.25000000  | 0.75000000  |

Li<sub>6</sub>MgCl<sub>8</sub>

|               |               |               |
|---------------|---------------|---------------|
| 11.0615997314 | 0.0000000000  | 0.0000000000  |
| 0.0000000000  | 11.0615997314 | 0.0000000000  |
| 0.0000000000  | 0.0000000000  | 11.0615997314 |

| Li | Mg | Br |
|----|----|----|
| 24 | 4  | 32 |

Direct

|            |            |            |
|------------|------------|------------|
| 0.50000000 | 0.75000000 | 0.25000000 |
| 0.50000000 | 0.25000000 | 0.75000000 |
| 0.50000000 | 0.25000000 | 0.25000000 |
| 0.50000000 | 0.75000000 | 0.75000000 |
| 0.25000000 | 0.50000000 | 0.75000000 |
| 0.75000000 | 0.50000000 | 0.25000000 |
| 0.25000000 | 0.50000000 | 0.25000000 |
| 0.75000000 | 0.50000000 | 0.75000000 |
| 0.75000000 | 0.25000000 | 0.50000000 |
| 0.25000000 | 0.75000000 | 0.50000000 |
| 0.25000000 | 0.25000000 | 0.50000000 |
| 0.75000000 | 0.75000000 | 0.50000000 |
| 0.25000000 | 0.00000000 | 0.25000000 |
| 0.75000000 | 0.00000000 | 0.75000000 |
| 0.25000000 | 0.00000000 | 0.75000000 |
| 0.75000000 | 0.00000000 | 0.25000000 |
| 0.75000000 | 0.75000000 | 0.00000000 |
| 0.25000000 | 0.25000000 | 0.00000000 |
| 0.25000000 | 0.75000000 | 0.00000000 |
| 0.75000000 | 0.25000000 | 0.00000000 |
| 0.00000000 | 0.75000000 | 0.75000000 |
| 0.00000000 | 0.25000000 | 0.25000000 |
| 0.00000000 | 0.25000000 | 0.75000000 |
| 0.00000000 | 0.75000000 | 0.25000000 |

|            |            |            |
|------------|------------|------------|
| 0.00000000 | 0.00000000 | 0.00000000 |
| 0.00000000 | 0.50000000 | 0.50000000 |
| 0.50000000 | 0.00000000 | 0.50000000 |
| 0.50000000 | 0.50000000 | 0.00000000 |
| 0.75000000 | 0.25000000 | 0.75000000 |
| 0.25000000 | 0.75000000 | 0.25000000 |
| 0.25000000 | 0.75000000 | 0.75000000 |
| 0.75000000 | 0.25000000 | 0.25000000 |
| 0.25000000 | 0.25000000 | 0.25000000 |
| 0.75000000 | 0.75000000 | 0.75000000 |
| 0.75000000 | 0.75000000 | 0.25000000 |
| 0.25000000 | 0.25000000 | 0.75000000 |
| 0.24267998 | 0.50000000 | 0.50000000 |
| 0.75731998 | 0.50000000 | 0.50000000 |
| 0.50000000 | 0.24267998 | 0.50000000 |
| 0.50000000 | 0.75731998 | 0.50000000 |
| 0.50000000 | 0.50000000 | 0.24267998 |
| 0.50000000 | 0.50000000 | 0.75731998 |
| 0.24267998 | 0.00000000 | 0.00000000 |
| 0.75731998 | 0.00000000 | 0.00000000 |
| 0.50000000 | 0.74268013 | 0.00000000 |
| 0.50000000 | 0.25731998 | 0.00000000 |
| 0.50000000 | 0.00000000 | 0.74268013 |
| 0.50000000 | 0.00000000 | 0.25731998 |
| 0.74268013 | 0.50000000 | 0.00000000 |
| 0.25731998 | 0.50000000 | 0.00000000 |
| 0.00000000 | 0.24267998 | 0.00000000 |
| 0.00000000 | 0.75731998 | 0.00000000 |
| 0.00000000 | 0.50000000 | 0.74268013 |
| 0.00000000 | 0.50000000 | 0.25731998 |
| 0.74268013 | 0.00000000 | 0.50000000 |
| 0.25731998 | 0.00000000 | 0.50000000 |
| 0.00000000 | 0.74268013 | 0.50000000 |
| 0.00000000 | 0.25731998 | 0.50000000 |
| 0.00000000 | 0.00000000 | 0.24267998 |
| 0.00000000 | 0.00000000 | 0.75731998 |
